# Supplementary material for: Hypoxia Selectively Increases a SMAD3 Signaling Axis to Promote Cancer Cell Invasion
Source: MDPI journal article supplement (doi:10.3390/cancers14112751), 2022-06-01
Supplement: s1 [file s1]

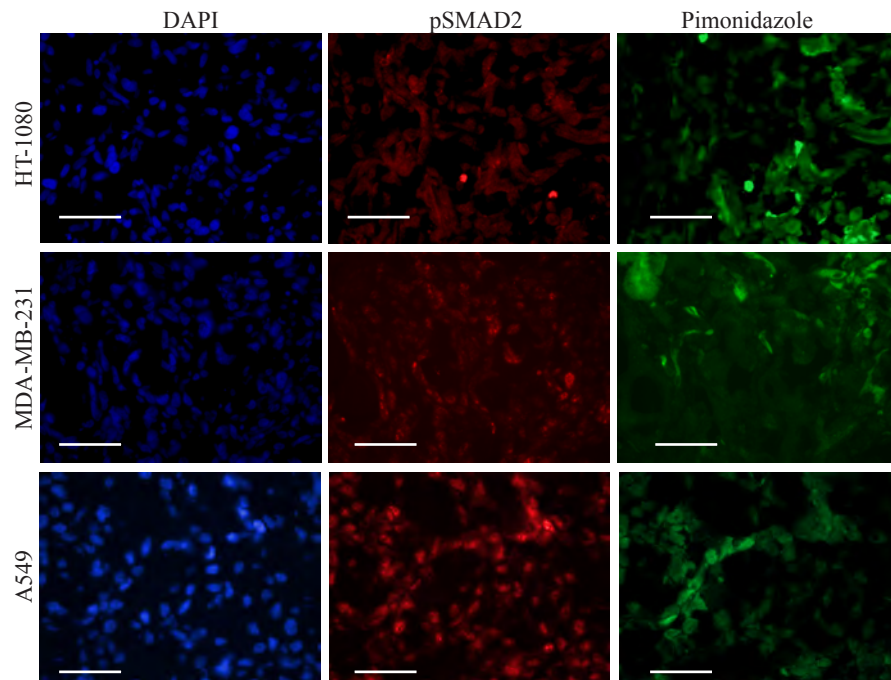

**Figure S1:** pSMAD2 Immunostaining in Tumor Xenografts.

Representative images of cryosections of HT1080, MDA-MB-231 and A549 xenograft tumors grown on chick embryo CAM, stained for nucleus (DAPI; blue), hypoxic regions (hypoxyprobe; red) and pSMAD2 (green). Scale bar = 50 $\mu$ m.

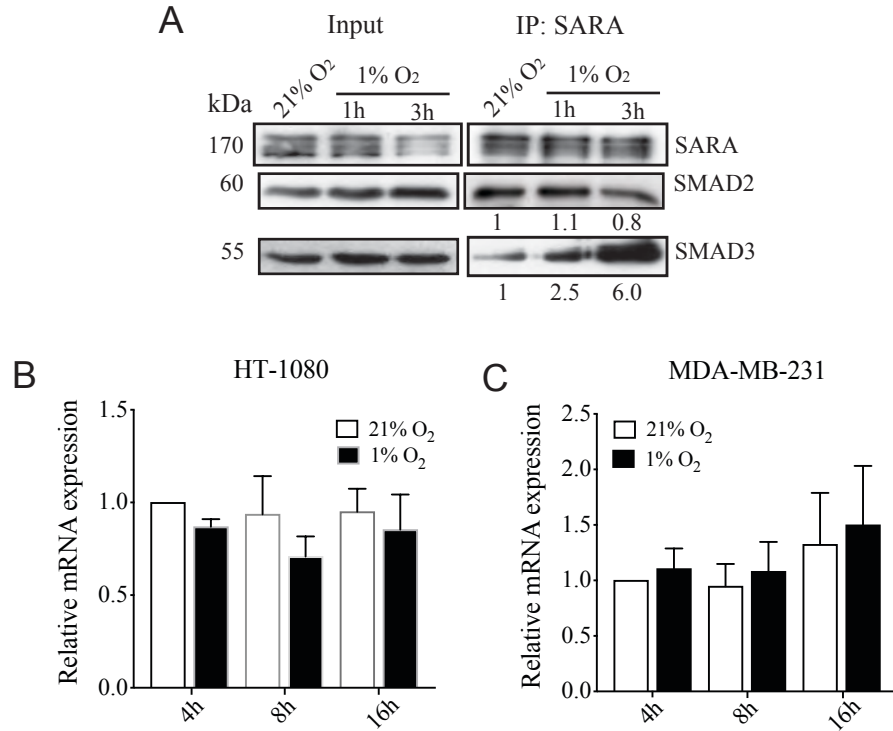

**Figure S2. Effect of Hypoxia on SARA/SMAD Interaction and SARA mRNA Expression.**

A) Representative western blot images from co-immunoprecipitation of SARA in HT-1080 cells incubated under normoxic (21% O<sub>2</sub>) or hypoxic (1% O<sub>2</sub>) conditions (N=2-3). B-C) Relative SARA mRNA expression in HT-1080 (B) and MDA-MB-231 (C) cells incubated under normoxic (21% O<sub>2</sub>) or hypoxic (1% O<sub>2</sub>) conditions (N=4).

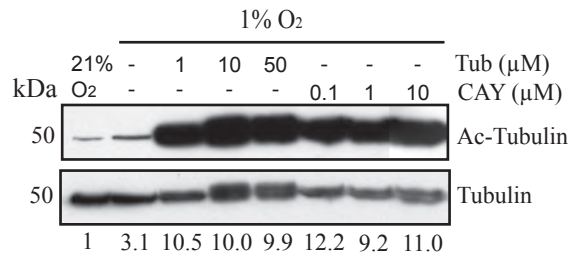

**Figure S3: Validation of the Efficacy of HDAC6 Inhibitors on Tubulin Acetylation.**

HT-1080 cells were treated with the HDAC6 inhibitors tubacin (Tub) or CAY10603 (CAY), then incubated for 3h under hypoxic conditions. A representative immunoblot for acetylated tubulin (Ac-Tubulin), using tubulin as control, is presented (N=2).

**Table S1: PCR Array Complete Normalized Results**

| sh SMAD2 |             |          | sh SMAD3 |             |          |
|----------|-------------|----------|----------|-------------|----------|
| Gene     | Fold (Log2) | p Value  | Gene     | Fold (Log2) | p Value  |
| ACTN1    | 1,0512      | 0,650195 | ACTN1    | 1,0282      | 0,755691 |
| ACTN3    | 1,0512      | 0,650195 | ACTN3    | 1,0282      | 0,755691 |
| ACTN4    | -1,601      | 0,001838 | ACTN4    | -1,4086     | 0,000934 |
| ACTR2    | -1,5846     | 0,005332 | ACTR2    | -1,1942     | 0,119284 |
| ACTR3    | -1,7358     | 0,005692 | ACTR3    | -1,1378     | 0,150733 |
| AKT1     | -1,6001     | 0,000079 | AKT1     | -1,1887     | 0,026884 |
| ARF6     | -1,5464     | 0,011389 | ARF6     | -1,5166     | 0,017677 |
| ARHGDIA  | -1,8705     | 0,000153 | ARHGDIA  | -1,1411     | 0,128329 |
| ARHGEF7  | -1,3619     | 0,086617 | ARHGEF7  | -1,0051     | 0,901162 |
| BAIAP2   | -1,0768     | 0,572282 | BAIAP2   | 1,0382      | 0,96586  |
| BCAR1    | 7,7734      | 0,644358 | BCAR1    | 2,8157      | 0,800436 |
| CAPN1    | 3,3695      | 0,257221 | CAPN1    | 2,7556      | 0,340549 |
| CAPN2    | -1,6005     | 0,045627 | CAPN2    | -1,1983     | 0,294669 |
| CAV1     | -1,9155     | 0,02281  | CAV1     | -1,1182     | 0,654529 |
| CDC42    | -1,4844     | 0,000306 | CDC42    | -1,3276     | 0,001692 |
| CFL1     | -1,3818     | 0,008717 | CFL1     | -1,1571     | 0,121643 |
| CRK      | -1,4178     | 0,00247  | CRK      | -1,1308     | 0,139902 |
| CSF1     | 1,8077      | 0,001682 | CSF1     | 2,9101      | 0,000057 |
| CTTN     | -1,2056     | 0,689472 | CTTN     | -1,2386     | 0,250915 |
| DIAPH1   | -2,0755     | 0,000183 | DIAPH1   | -1,1467     | 0,088939 |
| DPP4     | 1,0512      | 0,650195 | DPP4     | 1,0282      | 0,755691 |
| EGF      | -1,4252     | 0,223434 | EGF      | 1,4547      | 0,281117 |
| EGFR     | 1,1665      | 0,276396 | EGFR     | -1,0034     | 0,995355 |
| ENAH     | -1,1566     | 0,096705 | ENAH     | 1,1794      | 0,218943 |
| EZR      | -1,3214     | 0,030904 | EZR      | -1,1323     | 0,001338 |
| FAP      | 1,0512      | 0,650195 | FAP      | 1,0282      | 0,755691 |
| FGF2     | -1,0173     | 0,864536 | FGF2     | 1,1111      | 0,123445 |
| HGF      | 1,0512      | 0,650195 | HGF      | 1,0282      | 0,755691 |
| IGF1     | 1,0512      | 0,650195 | IGF1     | 1,1077      | 0,466248 |
| IGF1R    | -1,3623     | 0,246047 | IGF1R    | 1,5563      | 0,0561   |
| ILK      | -1,475      | 0,001832 | ILK      | -1,1302     | 0,157994 |
| ITGA4    | -1,3472     | 0,078309 | ITGA4    | -1,2799     | 0,162907 |
| ITGB1    | -1,1494     | 0,03276  | ITGB1    | -1,2263     | 0,015181 |
| ITGB2    | -1,2785     | 0,824238 | ITGB2    | -1,7993     | 0,012775 |
| ITGB3    | 2,1815      | 0,205607 | ITGB3    | 1,091       | 0,909822 |
| LIMK1    | 1,1142      | 0,18354  | LIMK1    | 1,4512      | 0,032482 |
| MAPK1    | -1,3538     | 0,232342 | MAPK1    | -1,1575     | 0,483864 |
| MET      | -1,1722     | 0,127515 | MET      | -4,3224     | 0,713818 |
| MMP14    | -1,5152     | 0,259784 | MMP14    | -1,1613     | 0,221749 |
| MMP2     | 1,6245      | 0,011912 | MMP2     | 1,1854      | 0,096688 |
| MMP9     | 3,6357      | 0,161805 | MMP9     | 4,6558      | 0,138464 |
| MSN      | -1,8227     | 0,000002 | MSN      | -1,4047     | 0,0006   |
| MYH10    | -1,4332     | 0,008434 | MYH10    | -1,0245     | 0,9826   |
| MYH9     | -1,399      | 0,018915 | MYH9     | -1,1415     | 0,085584 |
| MYL9     | -1,074      | 0,569954 | MYL9     | -1,374      | 0,000699 |
| MYLK     | 1,0421      | 0,657063 | MYLK     | 1,3067      | 0,097294 |
| PAK1     | -1,3507     | 0,266493 | PAK1     | -1,149      | 0,486884 |
| PAK4     | -1,4609     | 0,000372 | PAK4     | -1,263      | 0,005248 |
| PFN1     | -1,31       | 0,00256  | PFN1     | -1,361      | 0,000983 |
| PIK3CA   | -1,8204     | 0,00695  | PIK3CA   | -1,1945     | 0,092391 |
| PLAUR    | -1,1847     | 0,569853 | PLAUR    | -1,4437     | 0,001498 |

| sh SMAD2 |             |          | sh SMAD3 |             |          |
|----------|-------------|----------|----------|-------------|----------|
| Gene     | Fold (Log2) | p Value  | Gene     | Fold (Log2) | p Value  |
| PLCG1    | -1,6619     | 0,011998 | PLCG1    | -1,4048     | 0,114628 |
| PLD1     | -1,5945     | 0,08953  | PLD1     | -1,0753     | 0,794592 |
| PRKCA    | -1,119      | 0,651282 | PRKCA    | -1,0273     | 0,867933 |
| PTEN     | -1,3044     | 0,016048 | PTEN     | -1,1469     | 0,231486 |
| PTK2     | -1,5374     | 0,154967 | PTK2     | -1,152      | 0,336985 |
| PTK2B    | 1,3399      | 0,342445 | PTK2B    | -1,1323     | 0,574421 |
| PTPN1    | -1,7716     | 0,000921 | PTPN1    | -1,4411     | 0,022361 |
| PXN      | -1,4678     | 0,000469 | PXN      | -1,2314     | 0,009301 |
| RAC1     | -1,3389     | 0,049376 | RAC1     | -1,2343     | 0,092917 |
| RAC2     | -1,241      | 0,072    | RAC2     | 1,0798      | 0,517279 |
| RASA1    | -1,9121     | 0,024709 | RASA1    | -1,2718     | 0,13716  |
| RDX      | -1,6191     | 0,159707 | RDX      | 1,1605      | 0,430101 |
| RHO      | 1,0512      | 0,650195 | RHO      | 1,0282      | 0,755691 |
| RHOA     | -1,3772     | 0,0577   | RHOA     | -1,2803     | 0,062245 |
| RHOB     | 1,5424      | 0,060448 | RHOB     | 1,582       | 0,001676 |
| RHOC     | -1,5177     | 0,005159 | RHOC     | -1,4228     | 0,016014 |
| RND3     | 1,0785      | 0,578103 | RND3     | -1,1158     | 0,346226 |
| ROCK1    | -1,4714     | 0,00795  | ROCK1    | -1,2128     | 0,08207  |
| SH3PXD2A | -1,7536     | 0,062889 | SH3PXD2A | -1,5416     | 0,152633 |
| SRC      | -1,392      | 0,04199  | SRC      | 1,09        | 0,554541 |
| STAT3    | -1,4132     | 0,064154 | STAT3    | 1,4046      | 0,002208 |
| SVIL     | -1,7959     | 0,067608 | SVIL     | -1,8811     | 0,050104 |
| TGFB1    | -1,4177     | 0,018502 | TGFB1    | -1,3438     | 0,043888 |
| TIMP2    | -1,4744     | 0,171787 | TIMP2    | 1,3517      | 0,019804 |
| TLN1     | -1,3229     | 0,006406 | TLN1     | -1,327      | 0,018815 |
| VASP     | -2,0591     | 0,007324 | VASP     | -1,0992     | 0,518799 |
| VCL      | -2,0449     | 0,002523 | VCL      | -1,0169     | 0,856272 |
| VEGFA    | 1,1079      | 0,212341 | VEGFA    | -1,3397     | 0,11335  |
| VIM      | -1,2501     | 0,009462 | VIM      | -1,5326     | 0,001167 |
| WASF1    | -1,0664     | 0,351211 | WASF1    | -3,1729     | 0,502118 |
| WASF2    | -1,3823     | 0,025879 | WASF2    | -1,22       | 0,07723  |
| WASL     | -1,4031     | 0,377272 | WASL     | 1,0805      | 0,805697 |
| WIPF1    | -1,6813     | 0,099109 | WIPF1    | -1,6222     | 0,088615 |
| B2M      | 1,0906      | 0,131185 | B2M      | 1,2025      | 0,007214 |
| RPLP0    | -1,0754     | 0,13396  | RPLP0    | -1,1689     | 0,009126 |

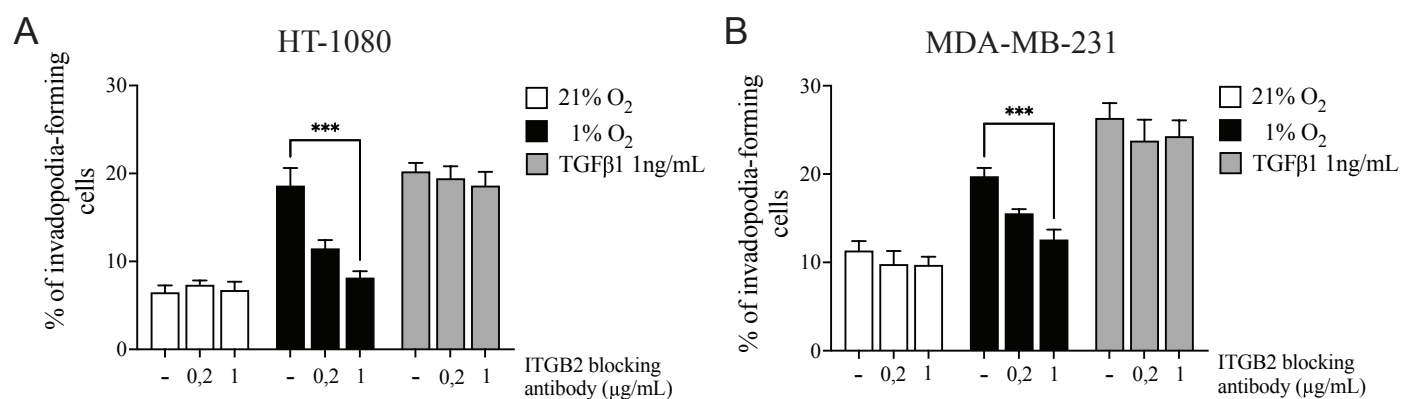

**Figure S4:** Effect of ITGB2 Blocking Antibody on Invadopodia Production.

HT-1080 (A) and MDA-MB-231 (B) cells were submitted to invadopodia assays under normoxic (21%), hypoxic (1% O<sub>2</sub>) or TGFβ1 supplemented conditions in the presence of ITGB2 blocking antibody or isotype control. (N=4) Results are presented as mean +/- SEM. \*\*\* P < 0.001.

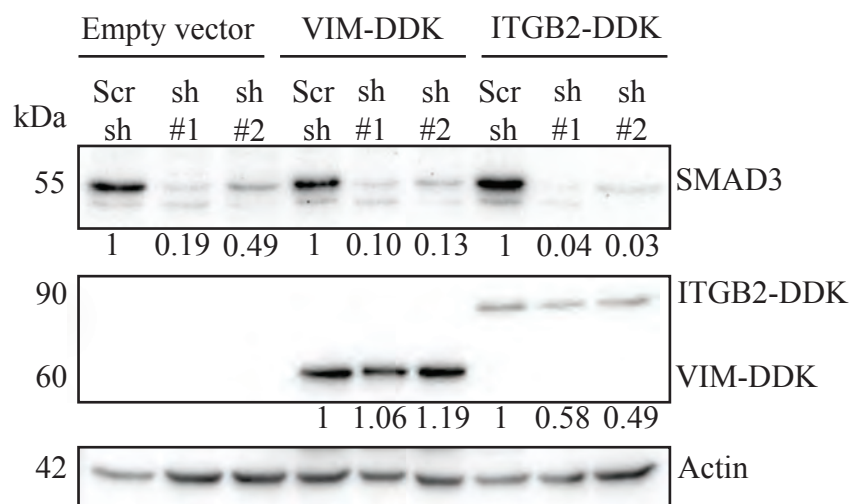

**Figure S5. Western Blotting Validation of Rescue Expression of VIM and ITGB2 in SMAD3-Depleted Cells.** HT1080 cells were immunoblotted for SMAD3, DDK (flag) and actin, as a loading control. Representative blots are presented (N=5).
