# Supplementary material for: Hypoxia Selectively Increases a SMAD3 Signaling Axis to Promote Cancer Cell Invasion
Source: MDPI journal article supplement (doi:10.3390/cancers14112751), 2022-06-01

Figure 3 - Original Blots

A

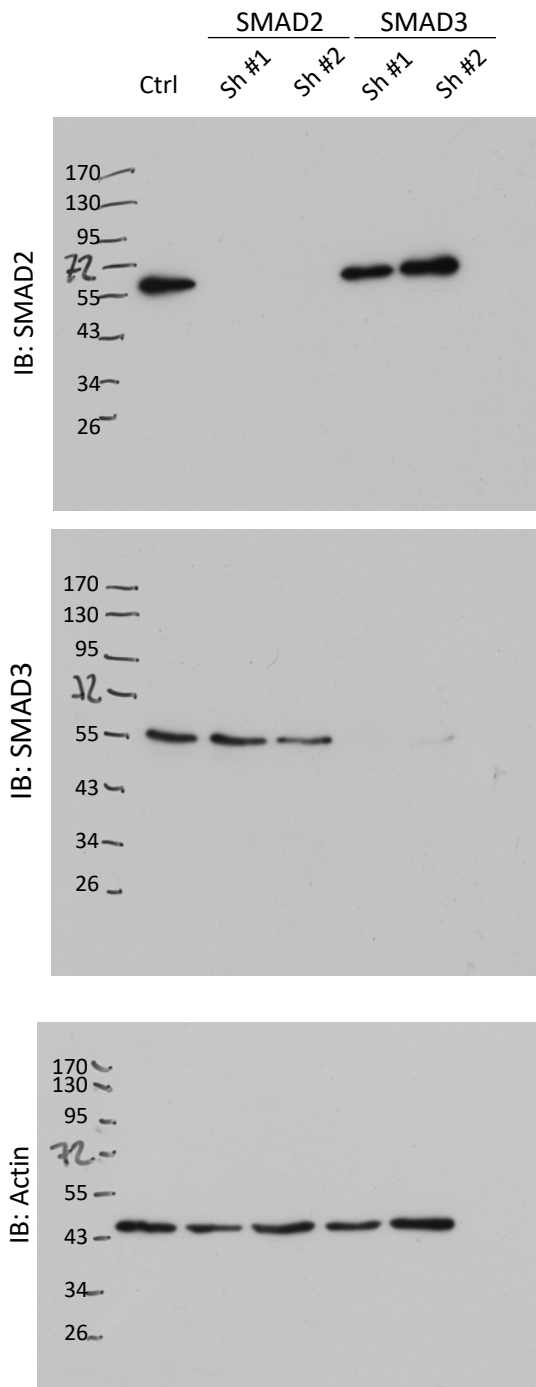

B

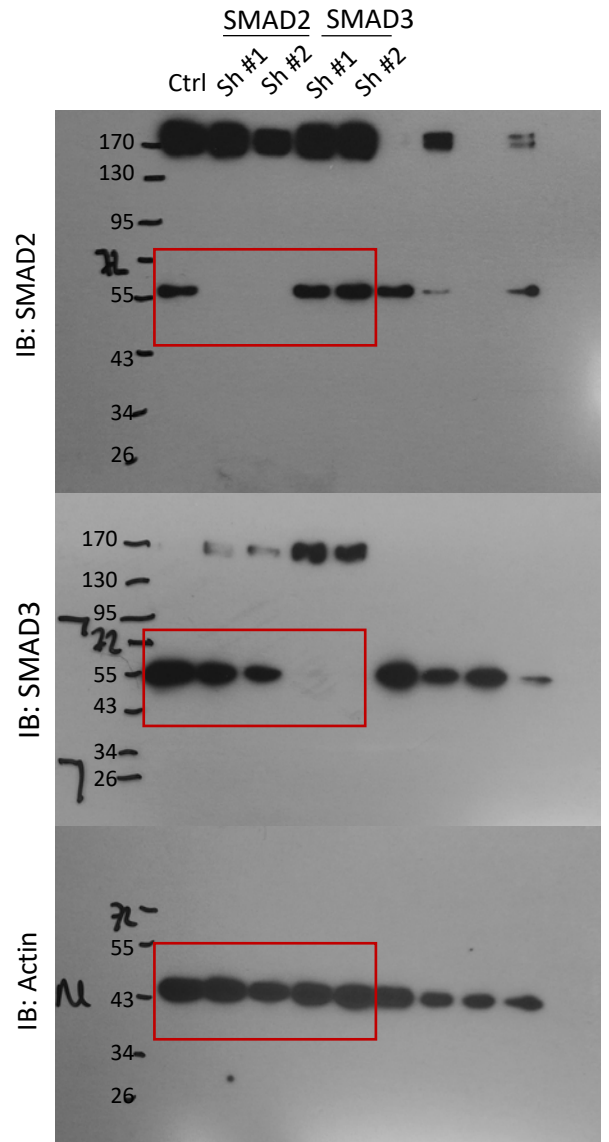

Figure 5 - Original Blots

A

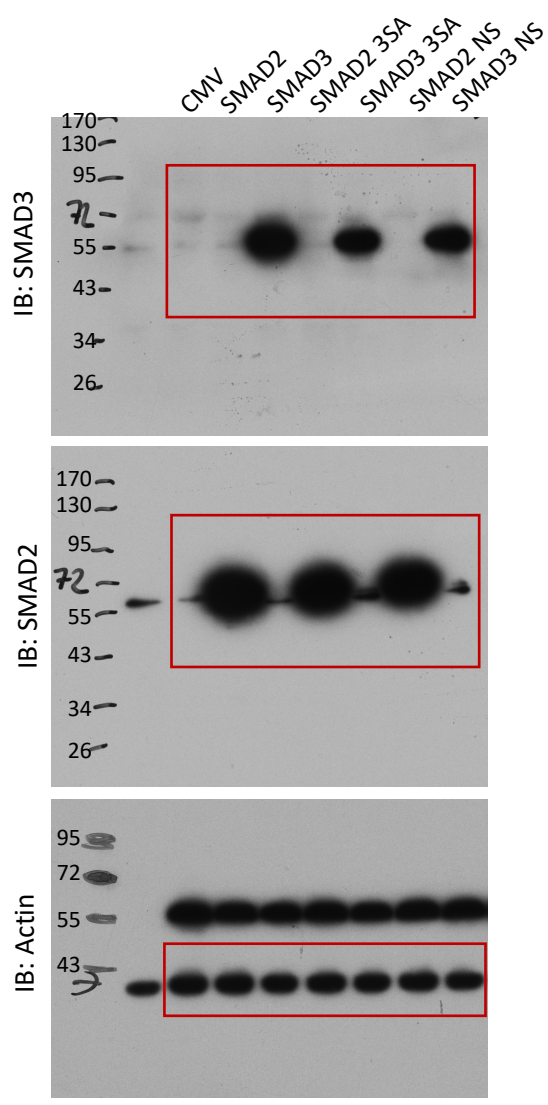

B

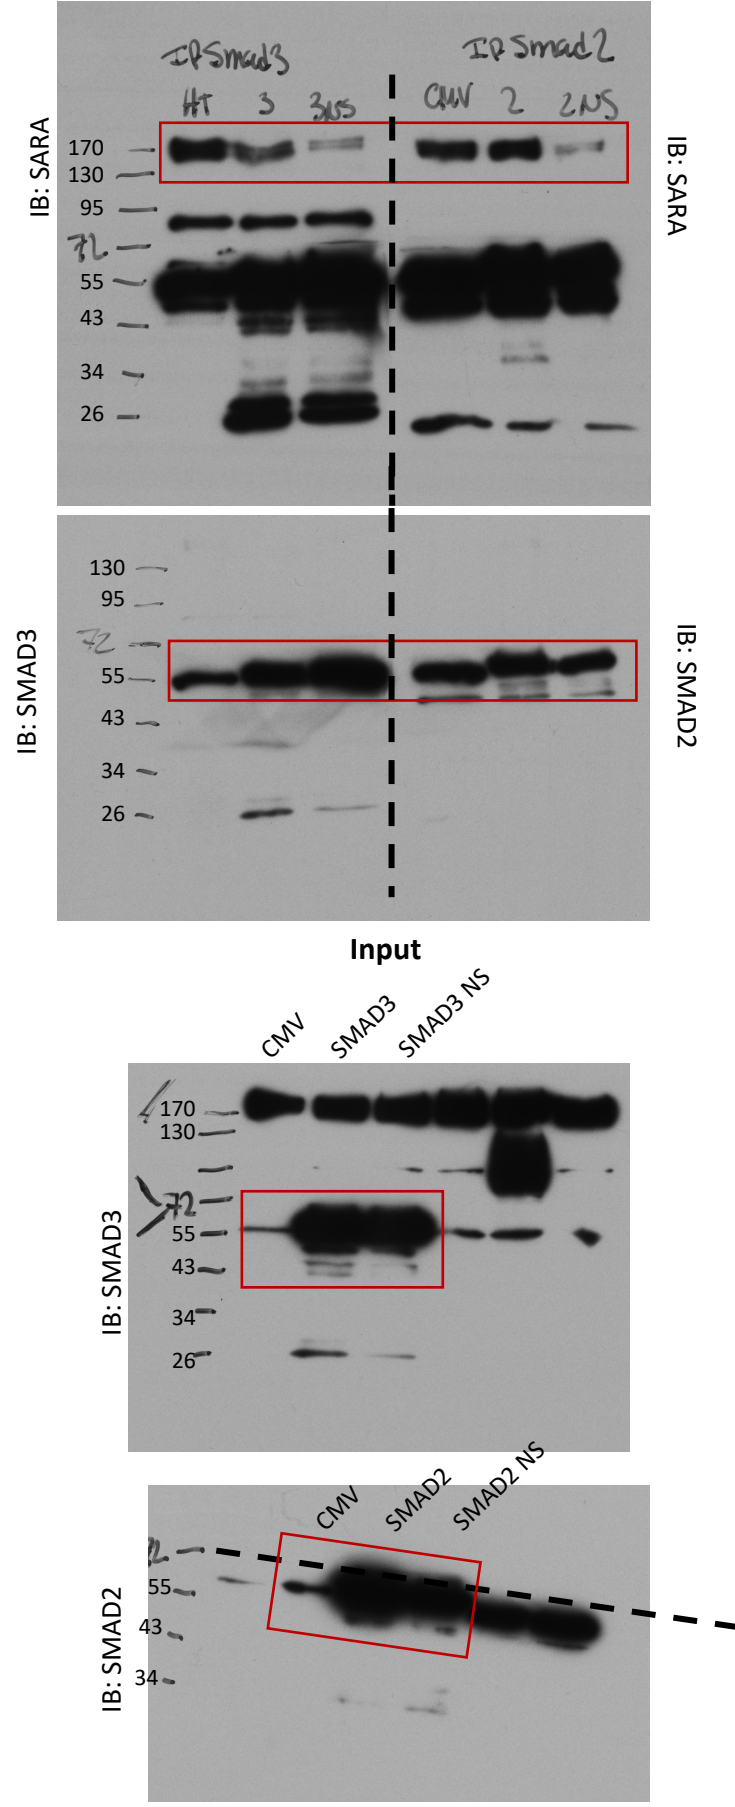

Figure 6 - Original Blots

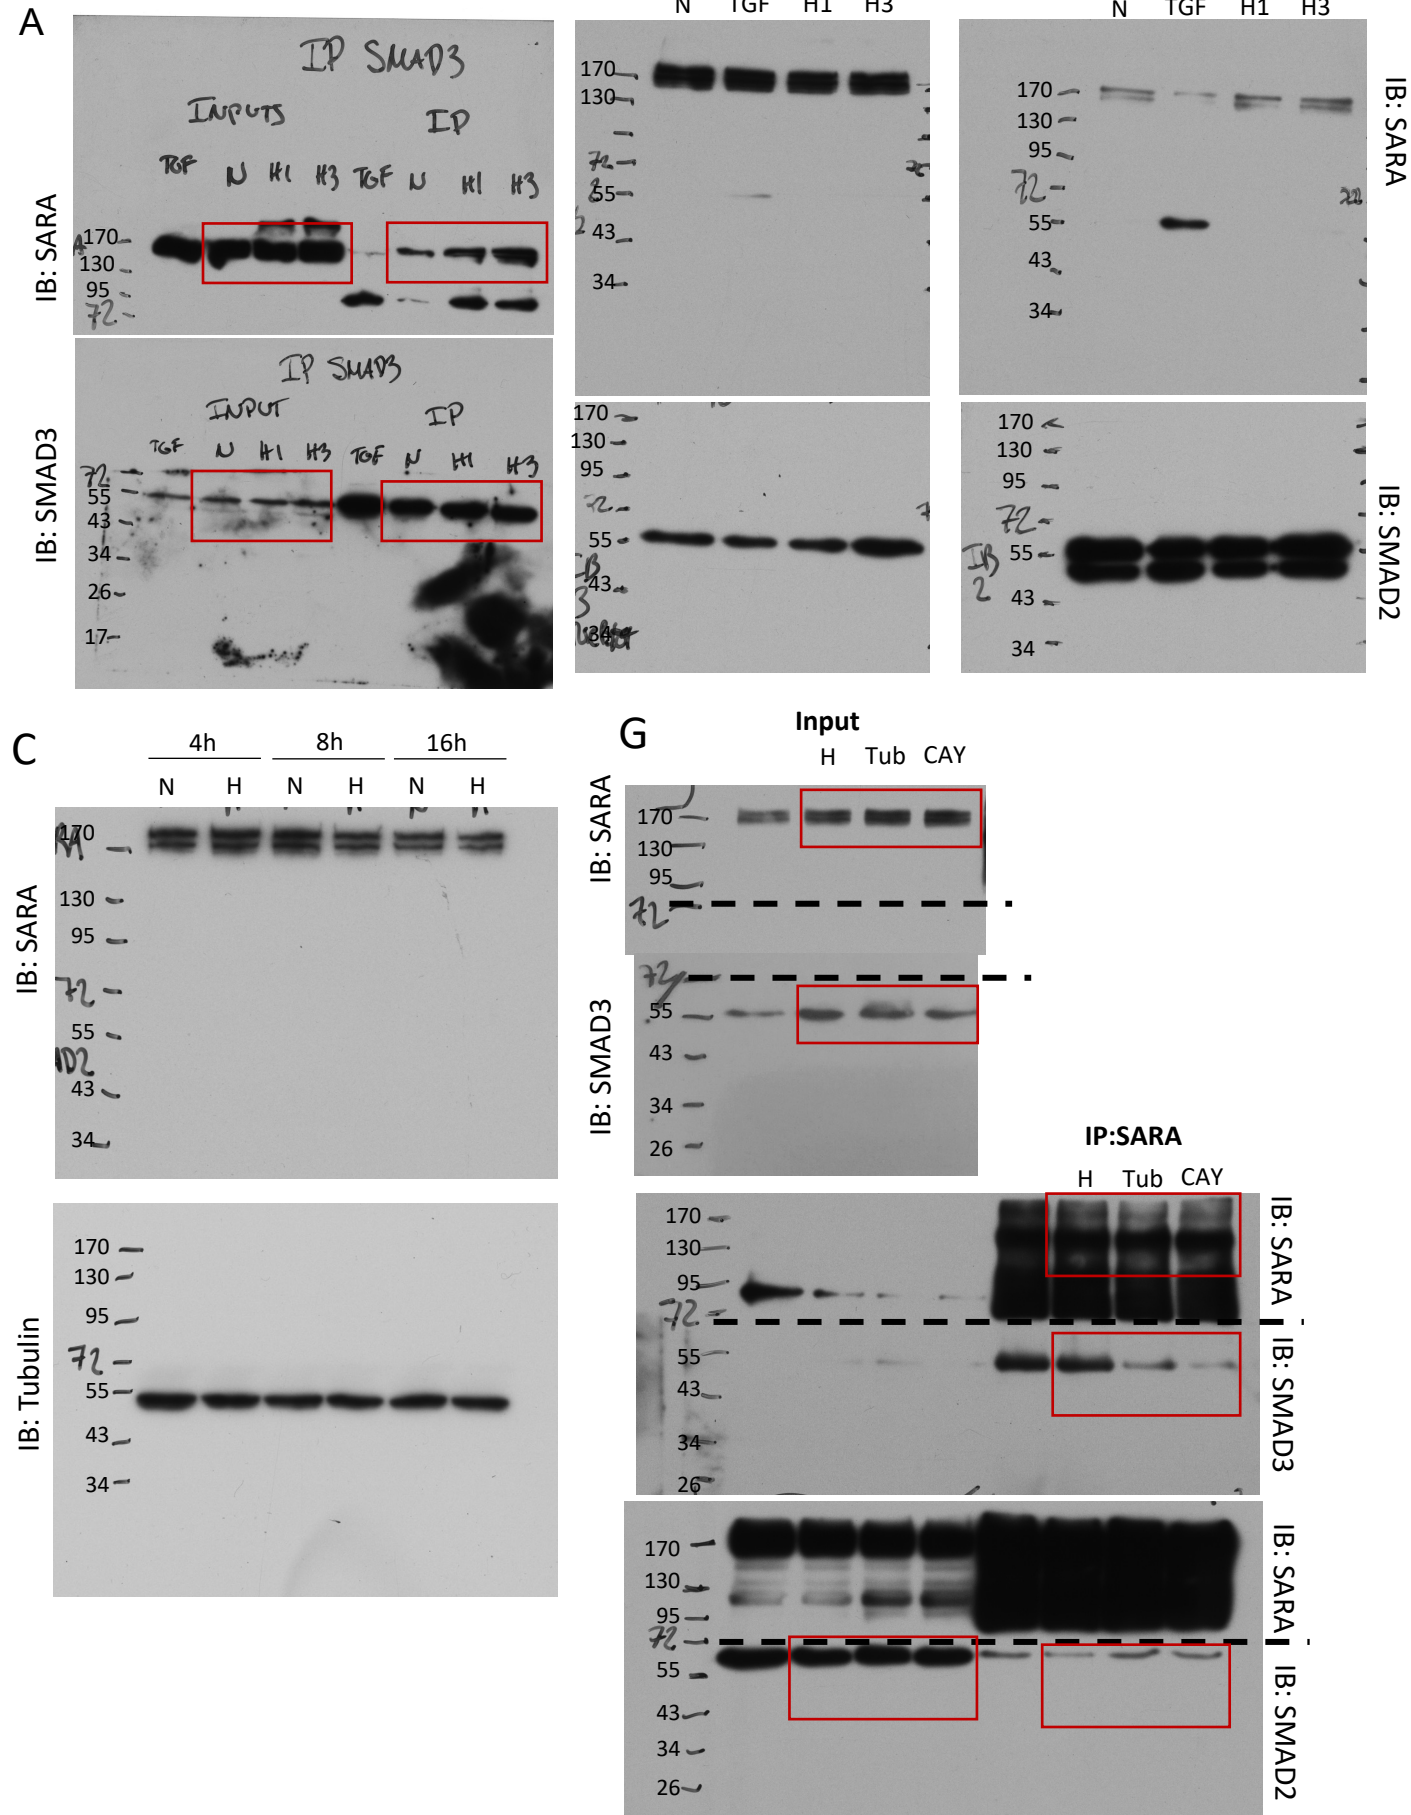

Figure S2 - Original blots

A

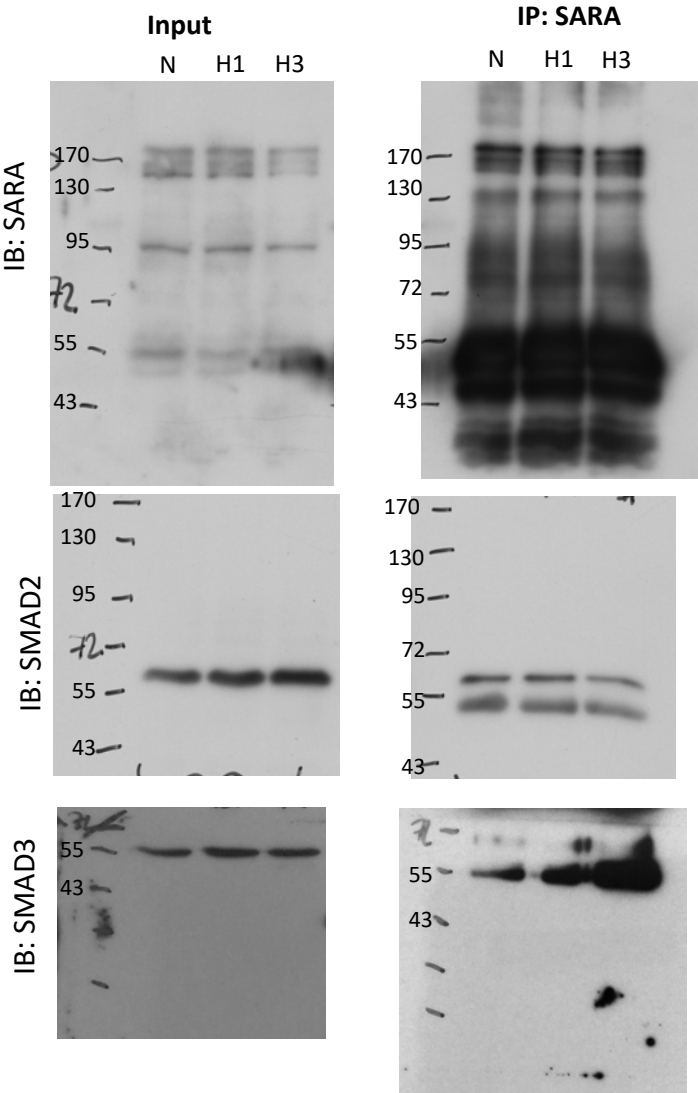

Figure S3 - Original blots

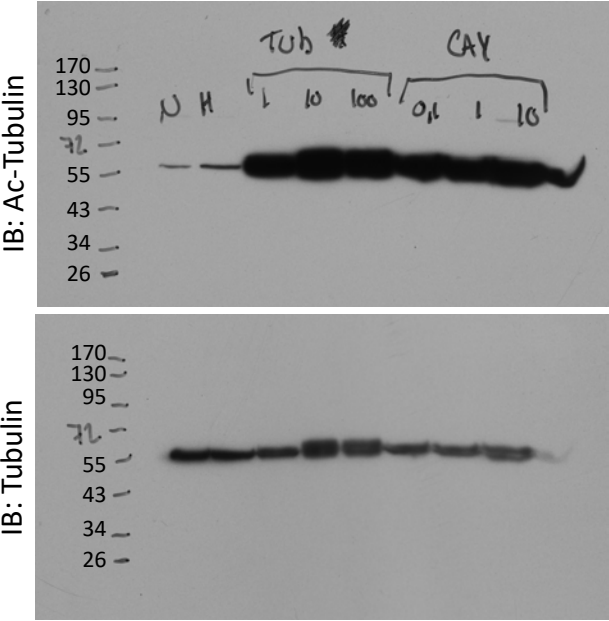

Figure S5 - Original blots

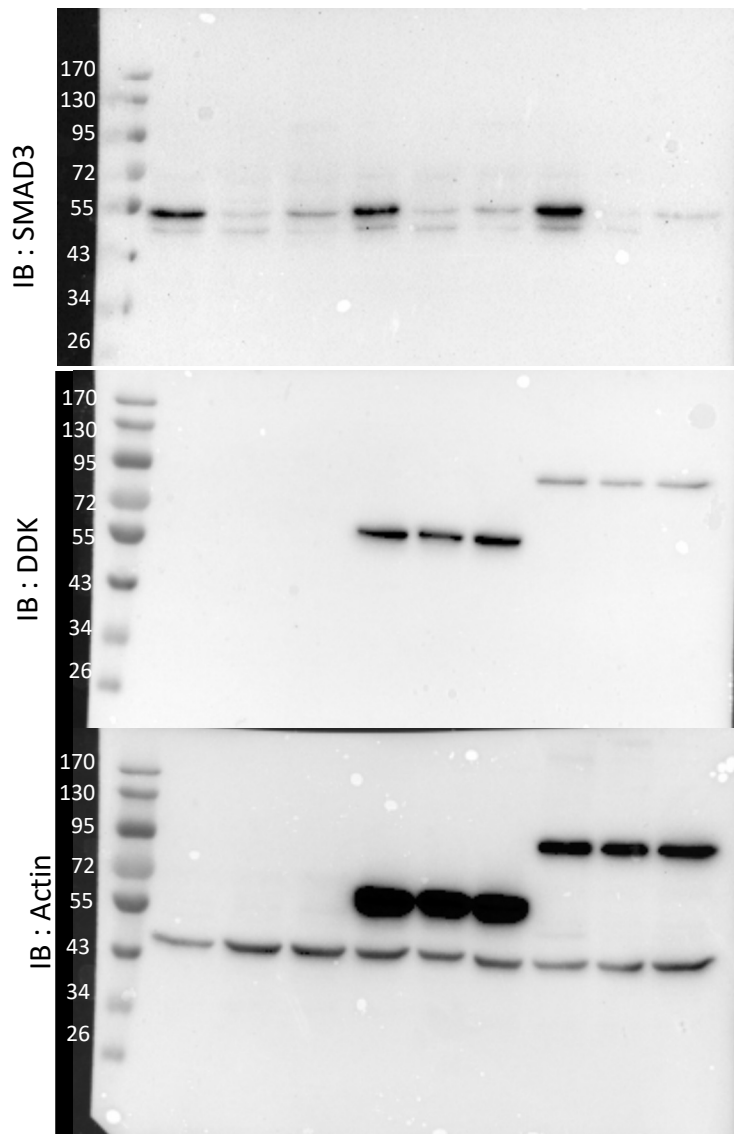

Supplement: s1 [file s1]
